# Supplementary material for: High practice variation in risk stratification, baseline oncological staging, and follow-up strategies for T1 colorectal cancers in the Netherlands
Source: PubMed Central journal article supplement — Endosc Int Open. 2020 Aug 31;8(9):E1117–22. doi: 10.1055/a-1192-3545 (PMC7458727; doi:10.1055/a-1192-3545), 2020-08-31
Supplement: 1819supmat-10-1055-a-1192-3545.pdf [file 1819supmat-10-1055-a-1192-3545.pdf]

## Supplementary Appendix

### Follow-up high-risk T1 CRC survey

This survey is composed as a consequence of discussion in the T1 CRC working group meeting. The setting is preparation for a trial of baseline oncological staging and surveillance of patients with high-risk T1 CRC who refrain from additional surgical resection.

High-risk T1 CRC is defined as macroscopically radical endoscopic resection, but pathology shows one or more of the following features:

- lymphovascular invasion;
- resection margin not free, indeterminable or  $< 0.1$  mm;
- poor differentiation or presence of signet cells;
- tumor budding grade 2/3.

1. In which type of hospital do you work?
  - a. Non-academic hospital,  $< 6$  gastroenterologists
  - b. Non-academic hospital, 6-10 gastroenterologists
  - c. Non-academic hospital,  $> 10$  gastroenterologists
  - d. Academic hospital
  - e. Private treatment center
2. What is your specialty?
  - a. Gastroenterologist
  - b. Internist
  - c. Surgeon
  - d. Other...
3. What is your age?
  - a.  $< 30$
  - b. 30-40
  - c. 40-50
  - d. 50-60
  - e.  $> 60$
4. What is your sex?

- a. Male
  - b. Female
5. You find a lesion which is presumably malignant, a second endoscopy for local resection is planned. Biopsies show high-grade dysplasia. How do you proceed regarding baseline oncologic staging?
- a. I perform baseline staging in every patient before resection
  - b. I first remove the lesion. In case of a malignancy, I perform baseline staging (4-6 weeks after resection)
  - c. I first remove the lesion, in case of a malignancy with high-risk features, I perform baseline staging (4-6 weeks after resection)
  - d. Other...
6. You have resected a lesion that unexpectedly contains a T1 CRC. How do you proceed regarding baseline oncologic staging?
- a. I perform baseline staging in every patient 4-6 weeks after endoscopic resection
  - b. I only perform baseline staging in case of a high-risk T1 CRC
  - c. If the endoscopic resection was radical, I do not perform baseline staging
  - d. Other...
7. Are all patients with a T1 CRC after local resection consequently discussed in a multidisciplinary oncological meeting in your hospital?
- a. Yes
  - b. No
8. Is the oncology guideline for colorectal carcinoma 3.0 (2014) in principle used in your hospital? (Only polypectomy is sufficient in case of a radical resection (resection margin > 1 mm) of a well to moderately differentiated T1 CRC without lymphovascular invasion. In all other cases, adjuvant surgical resection should be considered.)
- a. Yes
  - b. No
9. Which pathologic criteria do you use in your hospital to determinate whether a T1 CRC is high risk? (multiple answers possible)
- a. Resection margin not free/indeterminable (according to CRC guideline 3.0)
  - b. Tumor  $\leq$  1 mm from resection margin (according to CRC guideline 3.0)
  - c. Lymphangio-invasion(according to CRC guideline 3.0)



|              |  |  |  |  |  |  |  |  |  |  |  |
|--------------|--|--|--|--|--|--|--|--|--|--|--|
| Thorax x-ray |  |  |  |  |  |  |  |  |  |  |  |
| Rectal EUS   |  |  |  |  |  |  |  |  |  |  |  |
| CEA          |  |  |  |  |  |  |  |  |  |  |  |

14. Do you continue follow-up after 5 years?
  - a. Only endoscopically
  - b. Endoscopic and radiological
  - c. No
  - d. Other...
15. In which situation would you decide to proceed to surgery?
16. How many patients with a T1 CRC would you estimate that you have treated?
  - a. 0-10
  - b. 10-20
  - c. 20-30
  - d. > 30
  - e. Other...
17. How many times have you seen a recurrence of a T1 CRC?
  - a. Never
  - b. 1-3
  - c. 3-5
  - d. 5-10
  - e. Other...
